# Supplementary material for: Polar moiety functionalized, controlled gelation to obtain highly efficient hydrogel nanocomposite: an expansion of green synthetic strategy
Source: Royal Society of Chemistry journal article supplement (doi:10.1039/d3nj03529h), 2023-01-01
Supplement: d3nj03529h1.pdf [file d3nj03529h1.pdf]

## Supplementary Information

### 1. Figures:

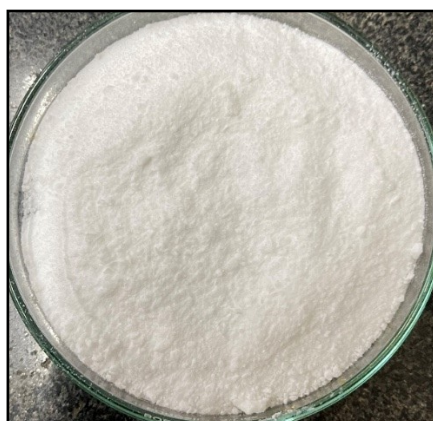

**Figure: Prepared ZnO nanoparticles**

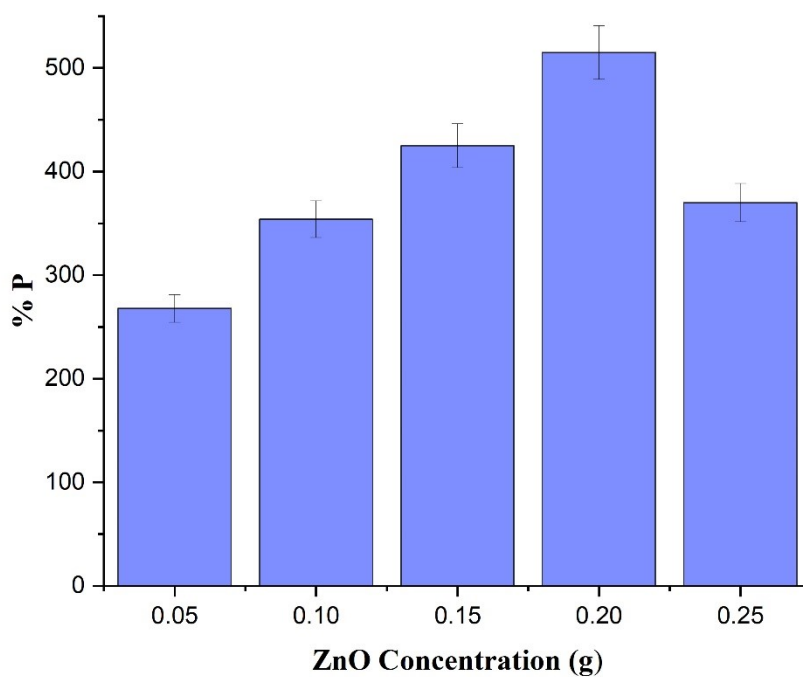

**Figure: Optimized reaction conditions with maximum %P for hydrogel nanocomposite**

## **2. List of Abbreviations**

ZnO- Zinc oxide

BM- *Butea monosperma*

AA- Acrylic acid

PAA- Poly acrylic acid

APS- Ammonium persulphate

MBA- N,N-methylene bisacrylamide

dH<sub>2</sub>O- Distilled water

P<sub>s</sub>- Percentage swelling

FTIR- Fourier transform infrared spectroscopy

XRD- X-ray diffraction

TGA- Thermogravimetric analysis

FE-SEM- Field emission scanning electron microscopy
